# Supplementary material for: The Percentage of Free PSA and Urinary Markers Distinguish Prostate Cancer from Benign Hyperplasia and Contribute to a More Accurate Indication for Prostate Biopsy
Source: MDPI journal article supplement (doi:10.3390/biomedicines8060173), 2020-06-25
Supplement: s1 [file s1]

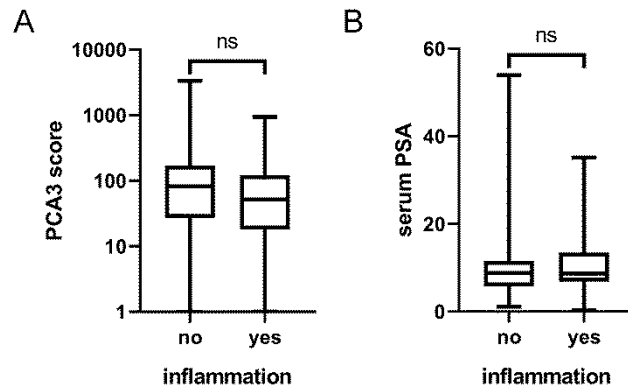

**Figure S1** . PCA3 score (A), but also serum PSA (B) were not affected by inflammation in the study by Hessels *et al.* [23] ( $p=0.226$  and  $p=0.655$ , respectively; ns, not significant; box-plots were generated from data provided in the original article).

A

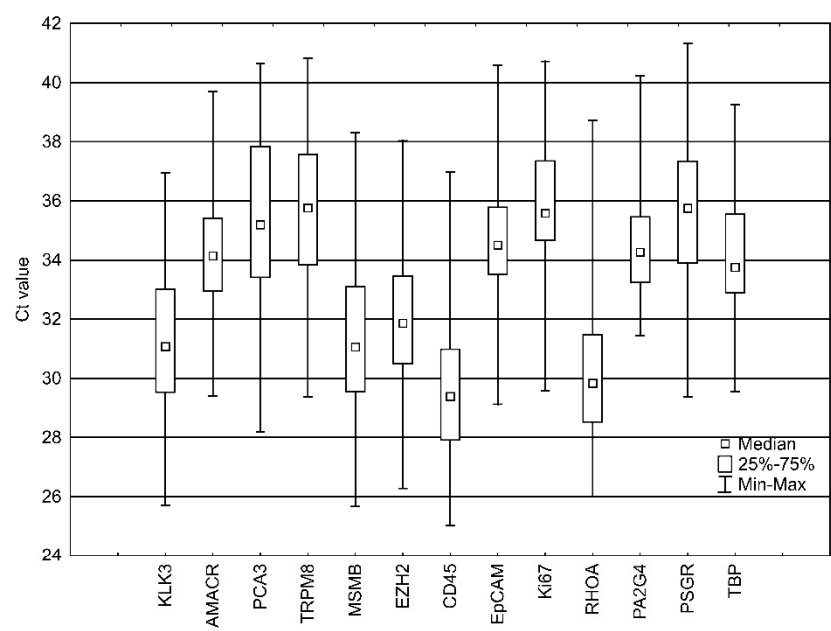

B

| LNCaP   | Leukocytes | log leu |
|---------|------------|---------|
| 100 000 | 10         | 1       |
| 100 000 | 100        | 2       |
| 100 000 | 1000       | 3       |
| 90 000  | 10 000     | 4       |
| 1000    | 100 000    | 5       |

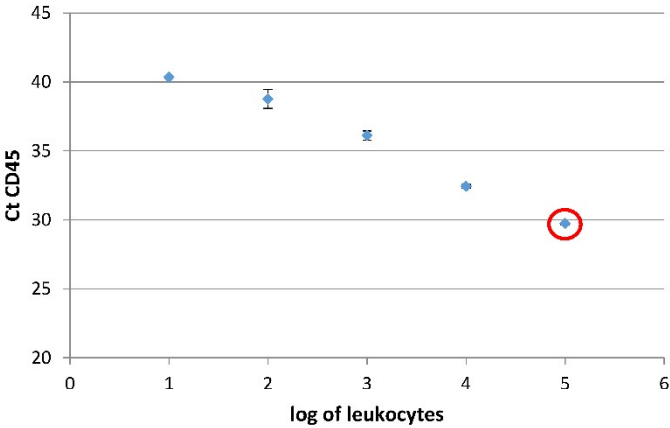

C

| LNCaP   | Leukocytes | log LNCaP |
|---------|------------|-----------|
| 10      | 100 000    | 1         |
| 100     | 100 000    | 2         |
| 1000    | 100 000    | 3         |
| 10 000  | 90 000     | 4         |
| 100 000 | 1000       | 5         |

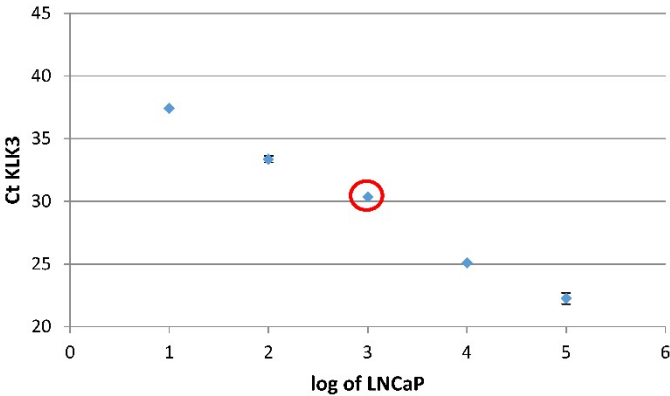

**Figure S2** . Results of dilution experiments with leukocytes and LNCaP prostate cancer cells are in good concordance with real Ct values from patients samples. **(A)** Range of Ct values of the urine transcripts from all patients. Box-plots represent median, 25%-75% percentiles and range of values. **(B)** Dilution serie of leukocytes in prostate cancer LNCaP cells. One hundred thousands of leukocytes gave Ct value of CD45 close to 30 which was very similar to the mean from our urine samples (CD45 mean 29.6). **(C)** Dilution serie of LNCaP cells in leukocytes. Mean of Ct value for KLK3 from patients samples was 31.2 which was close to the value of 1000 LNCaP prostate cancer cells. Red cycle shows Ct values around 30.

**Table S1.** Primers and probes used in the study.

| Marker <sup>1</sup> | Gene ID        | Primers and probes                                                                                          | Position or cat.no. <sup>2</sup> | Product |
|---------------------|----------------|-------------------------------------------------------------------------------------------------------------|----------------------------------|---------|
| <i>AMACR</i>        | NM_001167595.1 | FW-5'-TCAACTATTGGCTTTGTCAGG-3'<br>RV-5'-GTGAGAATCCGTATGCCCC-3'<br>probe UPL #29                             | exon 2/3<br>exon 3               | 67 bp   |
| <i>CD45/PTPRC</i>   | NM_001267798.1 | TaqMan Gene Expression Assay<br>probe FAM-MGB                                                               | Hs04189704_m1                    | 57 bp   |
| <i>EPCAM</i>        | NM_002354.2    | FW-5'-AGTTGGTGCACAAAATACTGTCAT-3'<br>RV-5'-TCCCAAGTTTGTAGCCATTC-3'<br>probe UPL #8                          | exon 2<br>exon 3                 | 89 bp   |
| <i>EZH2</i>         | NM_004456.3    | FW-5'-GATGATGGAGACGATCCTGAA-3'<br>RV-5'-GGGCGGCTTTCTTTATCAT-3'<br>probe UPL #65                             | exon 5<br>exon 5/6               | 80 bp   |
| <i>Ki67/MKI67</i>   | NM_002417.4    | FW-5'-TCAAGGAACTGATTTCAGGAGAAG-3'<br>RV-5'-GTGCACTGAAGAACACATTTC-3'<br>probe UPL #32                        | exon 13<br>exon 13               | 77 bp   |
| <i>KLK3</i>         | NM_001648.2    | FW-5'-GTCTGCGGCGGTGTTCTG-3'<br>RV-5'-GCCGACCCAGCAAGATC-3'<br>5'-FAM-CACAGCTGCCCACTGCATCAGGA-BHQ1-3'         | exon 2<br>exon 3<br>exon 2       | 88 bp   |
| <i>MSMB</i>         | NM_002443.2    | FW-5'-AAATTTTCATGTTGCACCCTTG-3'<br>RV-5'-CCATTCCTGACAGAACAGGTC-3'<br>probe UPL #22                          | exon 3/4<br>exon 4               | 140 bp  |
| <i>PA2G4</i>        | NM_006191.2    | TaqMan Gene Expression Assay<br>probe FAM-MGB                                                               | Hs00854538_g1                    | 113 bp  |
| <i>PCA3</i>         | NR_015342.1    | FW-5'-GCACATTTCCAGCCCCTTTAAA-3'<br>RV-5'-GGGCGAGGCTCATCGAT-3'<br>5'-FAM-AGAAATGCCCGCCGCCATC-BHQ1-3'         | exon 3<br>exon 4<br>exon 4       | 113 bp  |
| <i>PSGR/OR51E2</i>  | NM_030774.3    | TaqMan Gene Expression Assay<br>probe FAM-MGB                                                               | Hs00258239_s1                    | 74 bp   |
| <i>RHOA</i>         | NM_001313941.1 | TaqMan Gene Expression Assay<br>probe FAM-MGB                                                               | Hs00357608_m1                    | 62 bp   |
| <i>TBP</i>          | NM_003194.5    | FW:5'-CACGAACCACGGCACTGATT-3'<br>RV:5'-TTTCTTGCTGCCAGTCTGGAC-3'<br>5'-Cy5-TCTTCACTCTTGGCTCCTGTGCACA-BHQ2-3' | exon 5<br>exon 6<br>exon5/6      | 89 bp   |
| <i>TRPM8</i>        | NM_024080.4    | FW-5'-TCAGAATAAGAAGGAACTCTCCAAA-3'<br>RV-5'-CAGCAGCATTGATGTCGTTC-3'<br>probe UPL #32                        | exon 13<br>exon 14               | 125 bp  |

<sup>1</sup> Gene names are as follows - alpha-methylacyl-CoA racemase (*AMACR*), leukocyte common antigen (*CD45*; official gene name *PTPRC*, Protein Tyrosine Phosphatase, Receptor Type C), epithelial cell adhesion molecule (*EPCAM*), enhancer of zeste homolog 2 (*EZH2*), marker of proliferation *Ki67* (*MKI67*), human kallikrein 3 (*KLK3*, also known as PSA, prostate specific antigen), beta-microseminoprotein (*MSMB*), proliferation associated protein 2G4 (*PA2G4*), prostate cancer antigen 3 (*PCA3*), prostate-specific G-protein coupled receptor (*PSGR*; official gene name *OR51E2*, olfactory receptor 51E2), Ras homolog gene family member A (*RHOA*), TATA-binding protein (*TBP*), transient receptor potential cation channel subfamily M member 8 (*TRPM8*).

<sup>2</sup> Indicated assays were purchased from Thermo Fisher Scientific.

Additional abbreviations are as follows: black hole quencher 1 (BHQ1), universal probe library (UPL), fluorescein amidite (FAM), minor groove binder (MGB)
